# Supplementary material for: Exposure to chemical cocktails before or after conception – The effect of timing on ovarian development
Source: PubMed Central journal article supplement (PMC3731555; doi:10.1016/j.mce.2013.06.016), 2013-08-25

**Fig. S1. Network 1.** Renal and Urological System Development and Function, Reproductive System Development and Function, Embryonic Development .

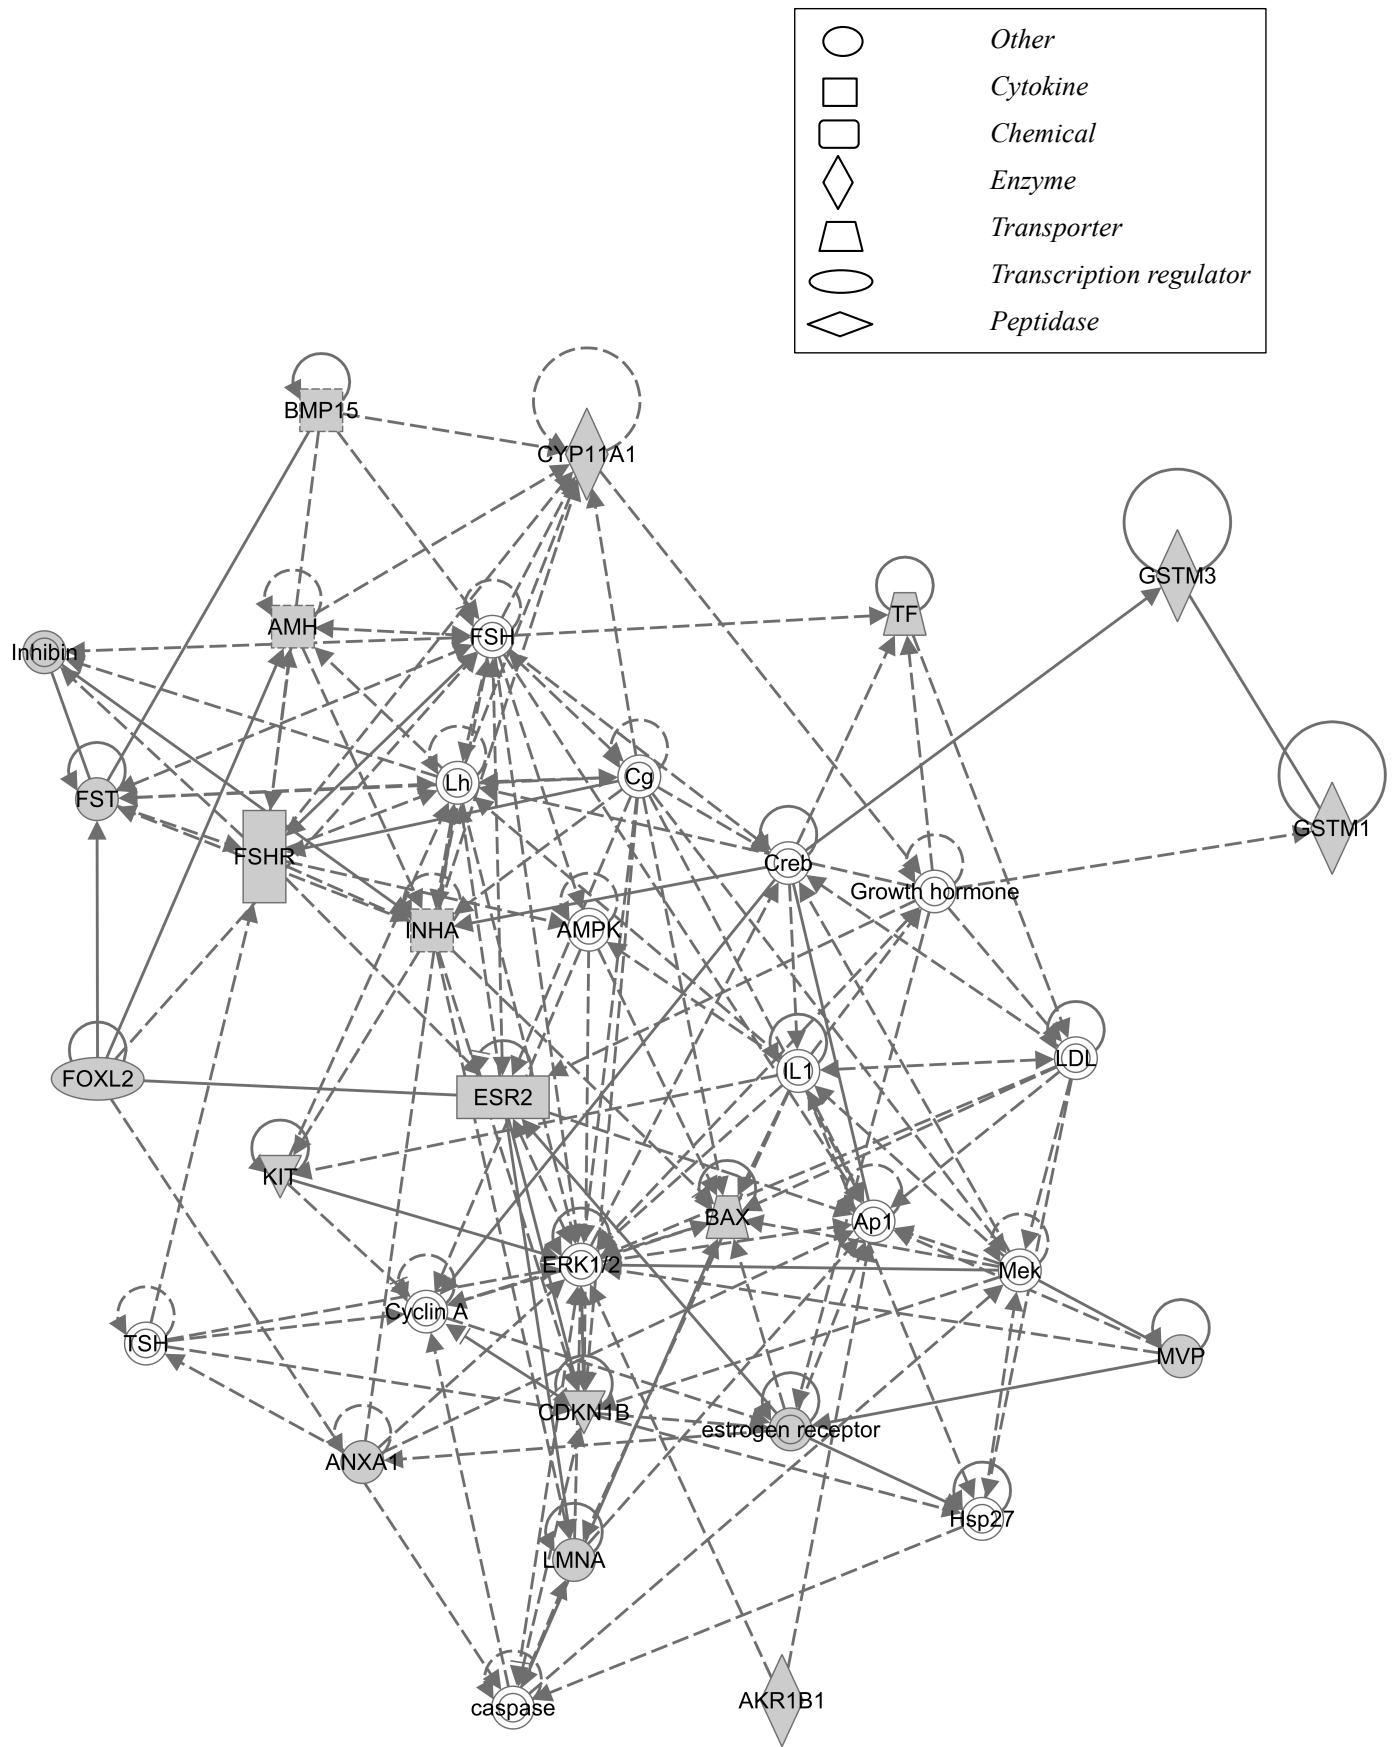

**Fig. S2. Network 2.** Post-Translational Modification, Protein Folding, Organismal Injury and Abnormalities .

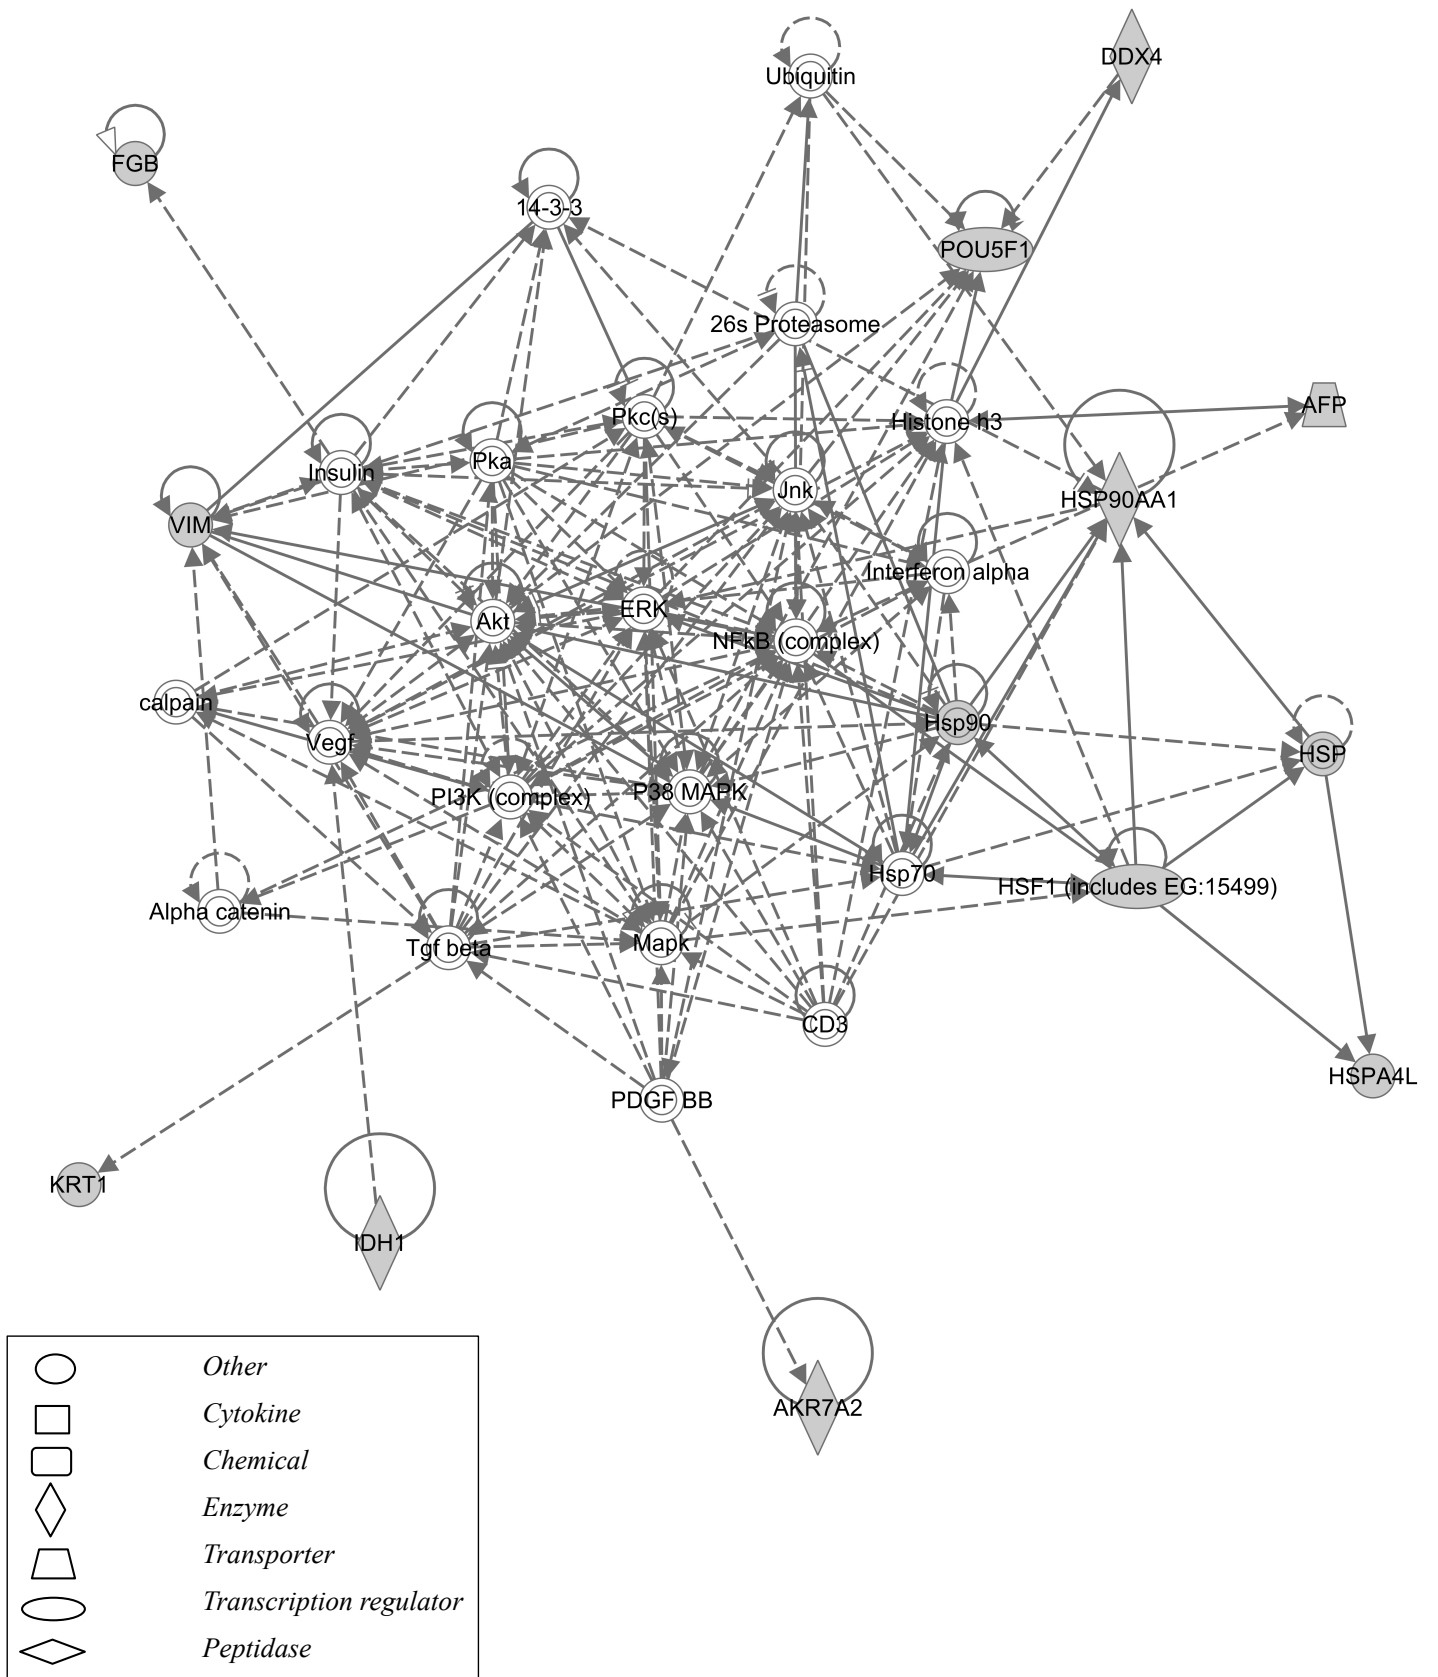

**Fig. S3. Network 3.** Cell Morphology, Cellular Compromise, DNA Replication, Recombination, and Repair .

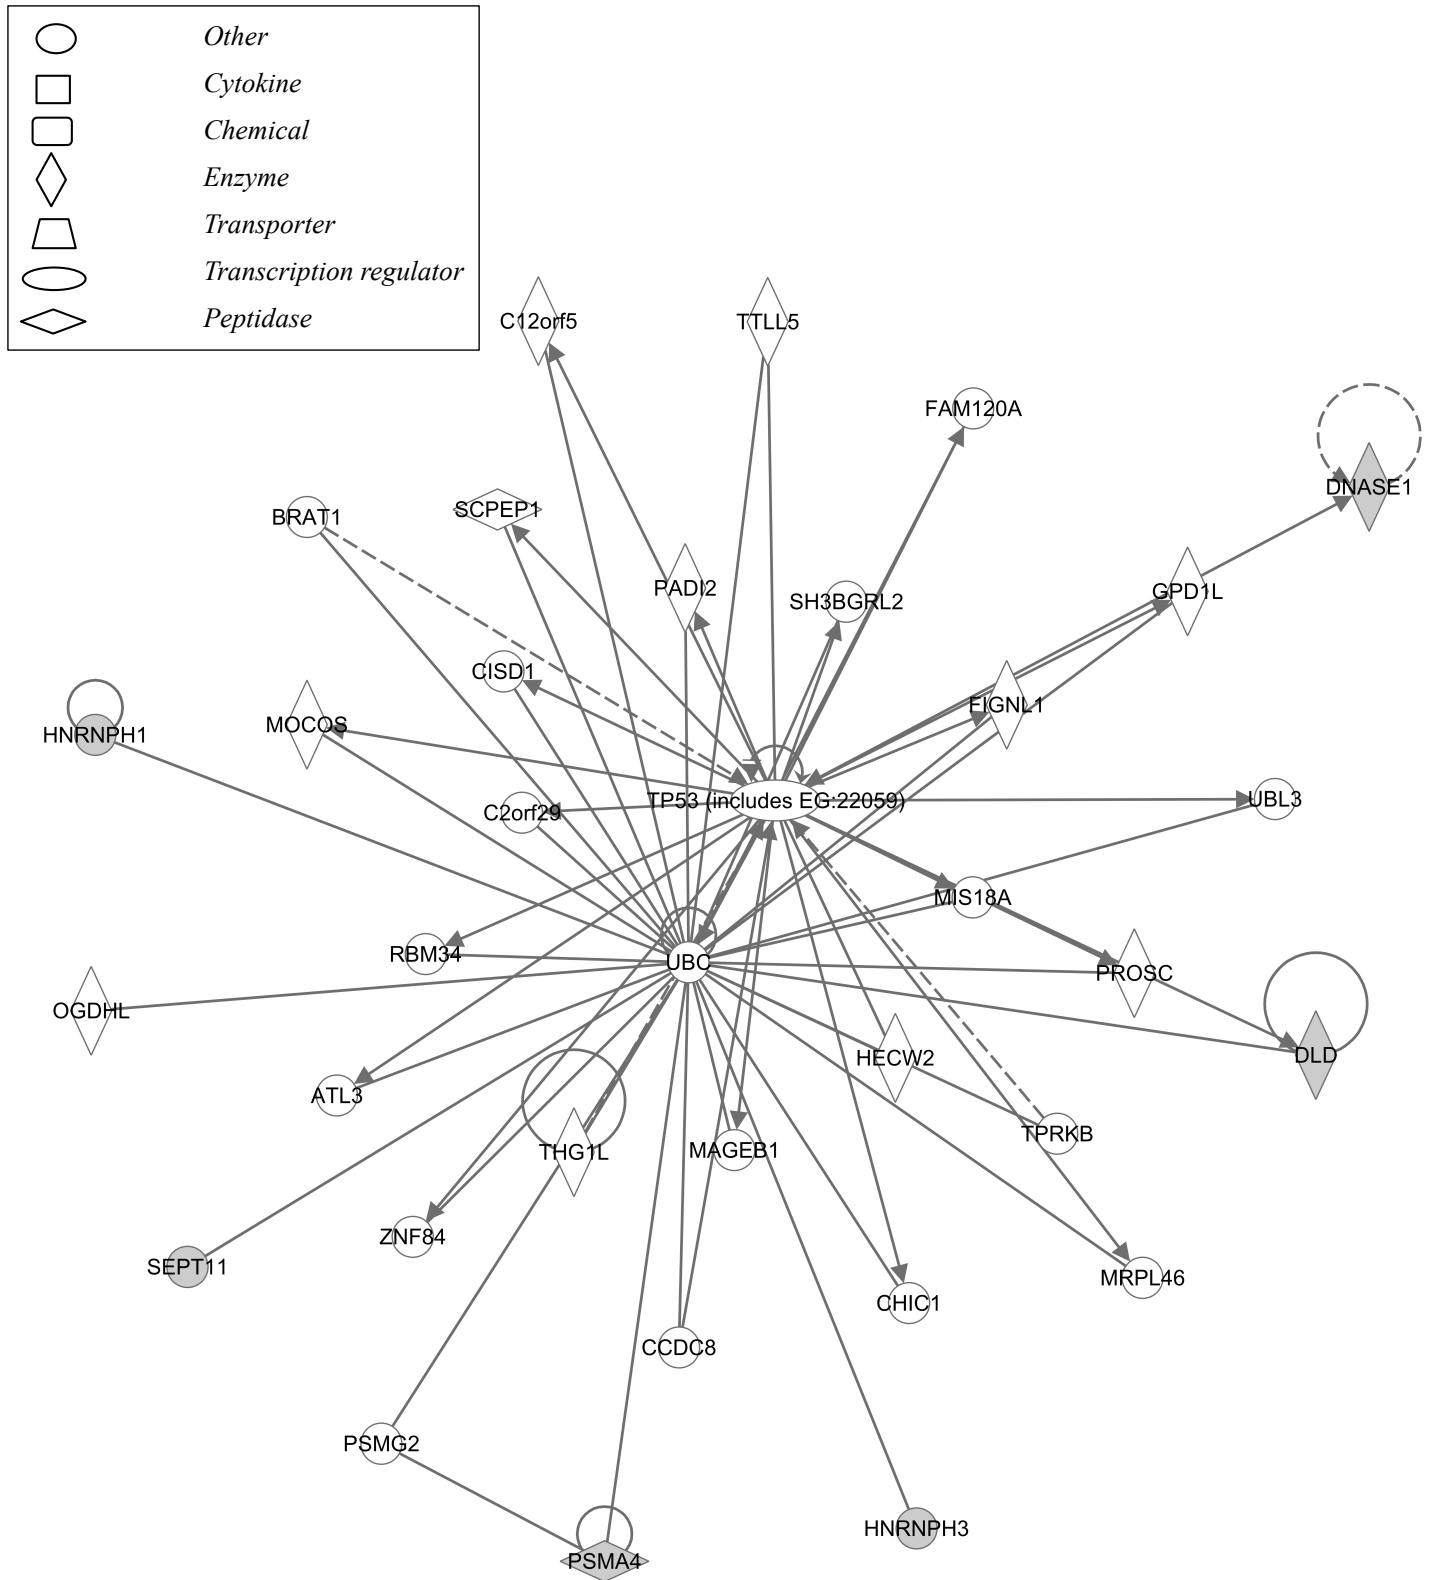

Supplement: mmc2.pdf [file mmc2.pdf]
